# Supplementary material for: The Bioactive Potential of Functional Products and Bioavailability of Phenolic Compounds
Source: PubMed Central journal article supplement (PMC7404707; doi:10.3390/foods9070953), 2020-07-18
Supplement: foods-09-00953-s001.pdf [file foods-09-00953-s001.pdf]

Supplementary Material

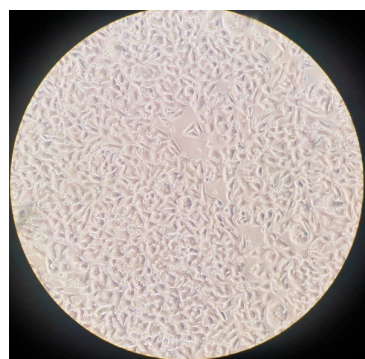

Control

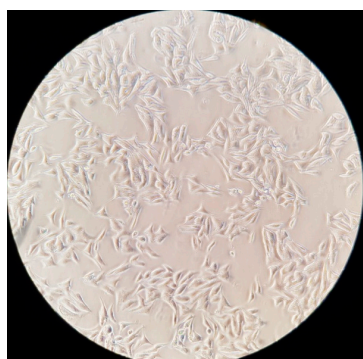

Wild berries

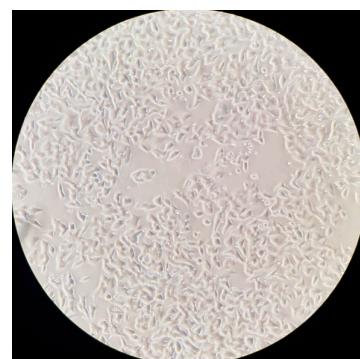

*A. linearis*

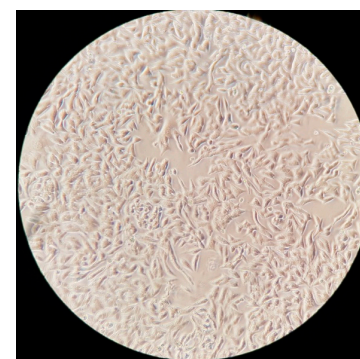

*A. chilensis*

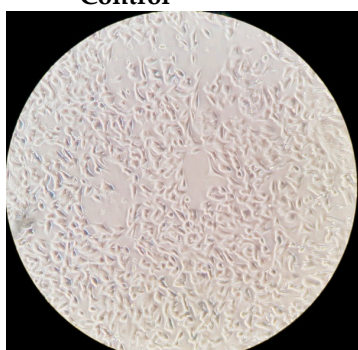

*P. cupana*

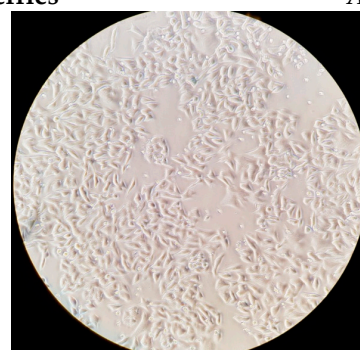

*S. aromaticum*

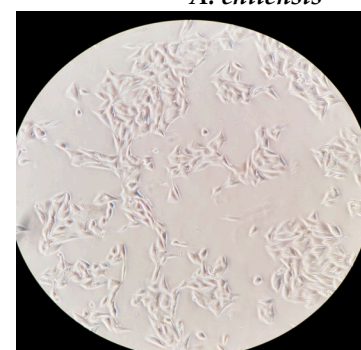

*I. paraguariensis*

Supplementary Figure S1. HCT-8 cell morphology modifications after cultivation with 10% extracts, 200X.
